# Supplementary figures and images for: Structure-Based Design of an RNase Chimera for Antimicrobial Therapy
Source: MDPI journal article supplement (doi:10.3390/ijms23010095), 2021-12-22

RNase 3/1-v3 distance map

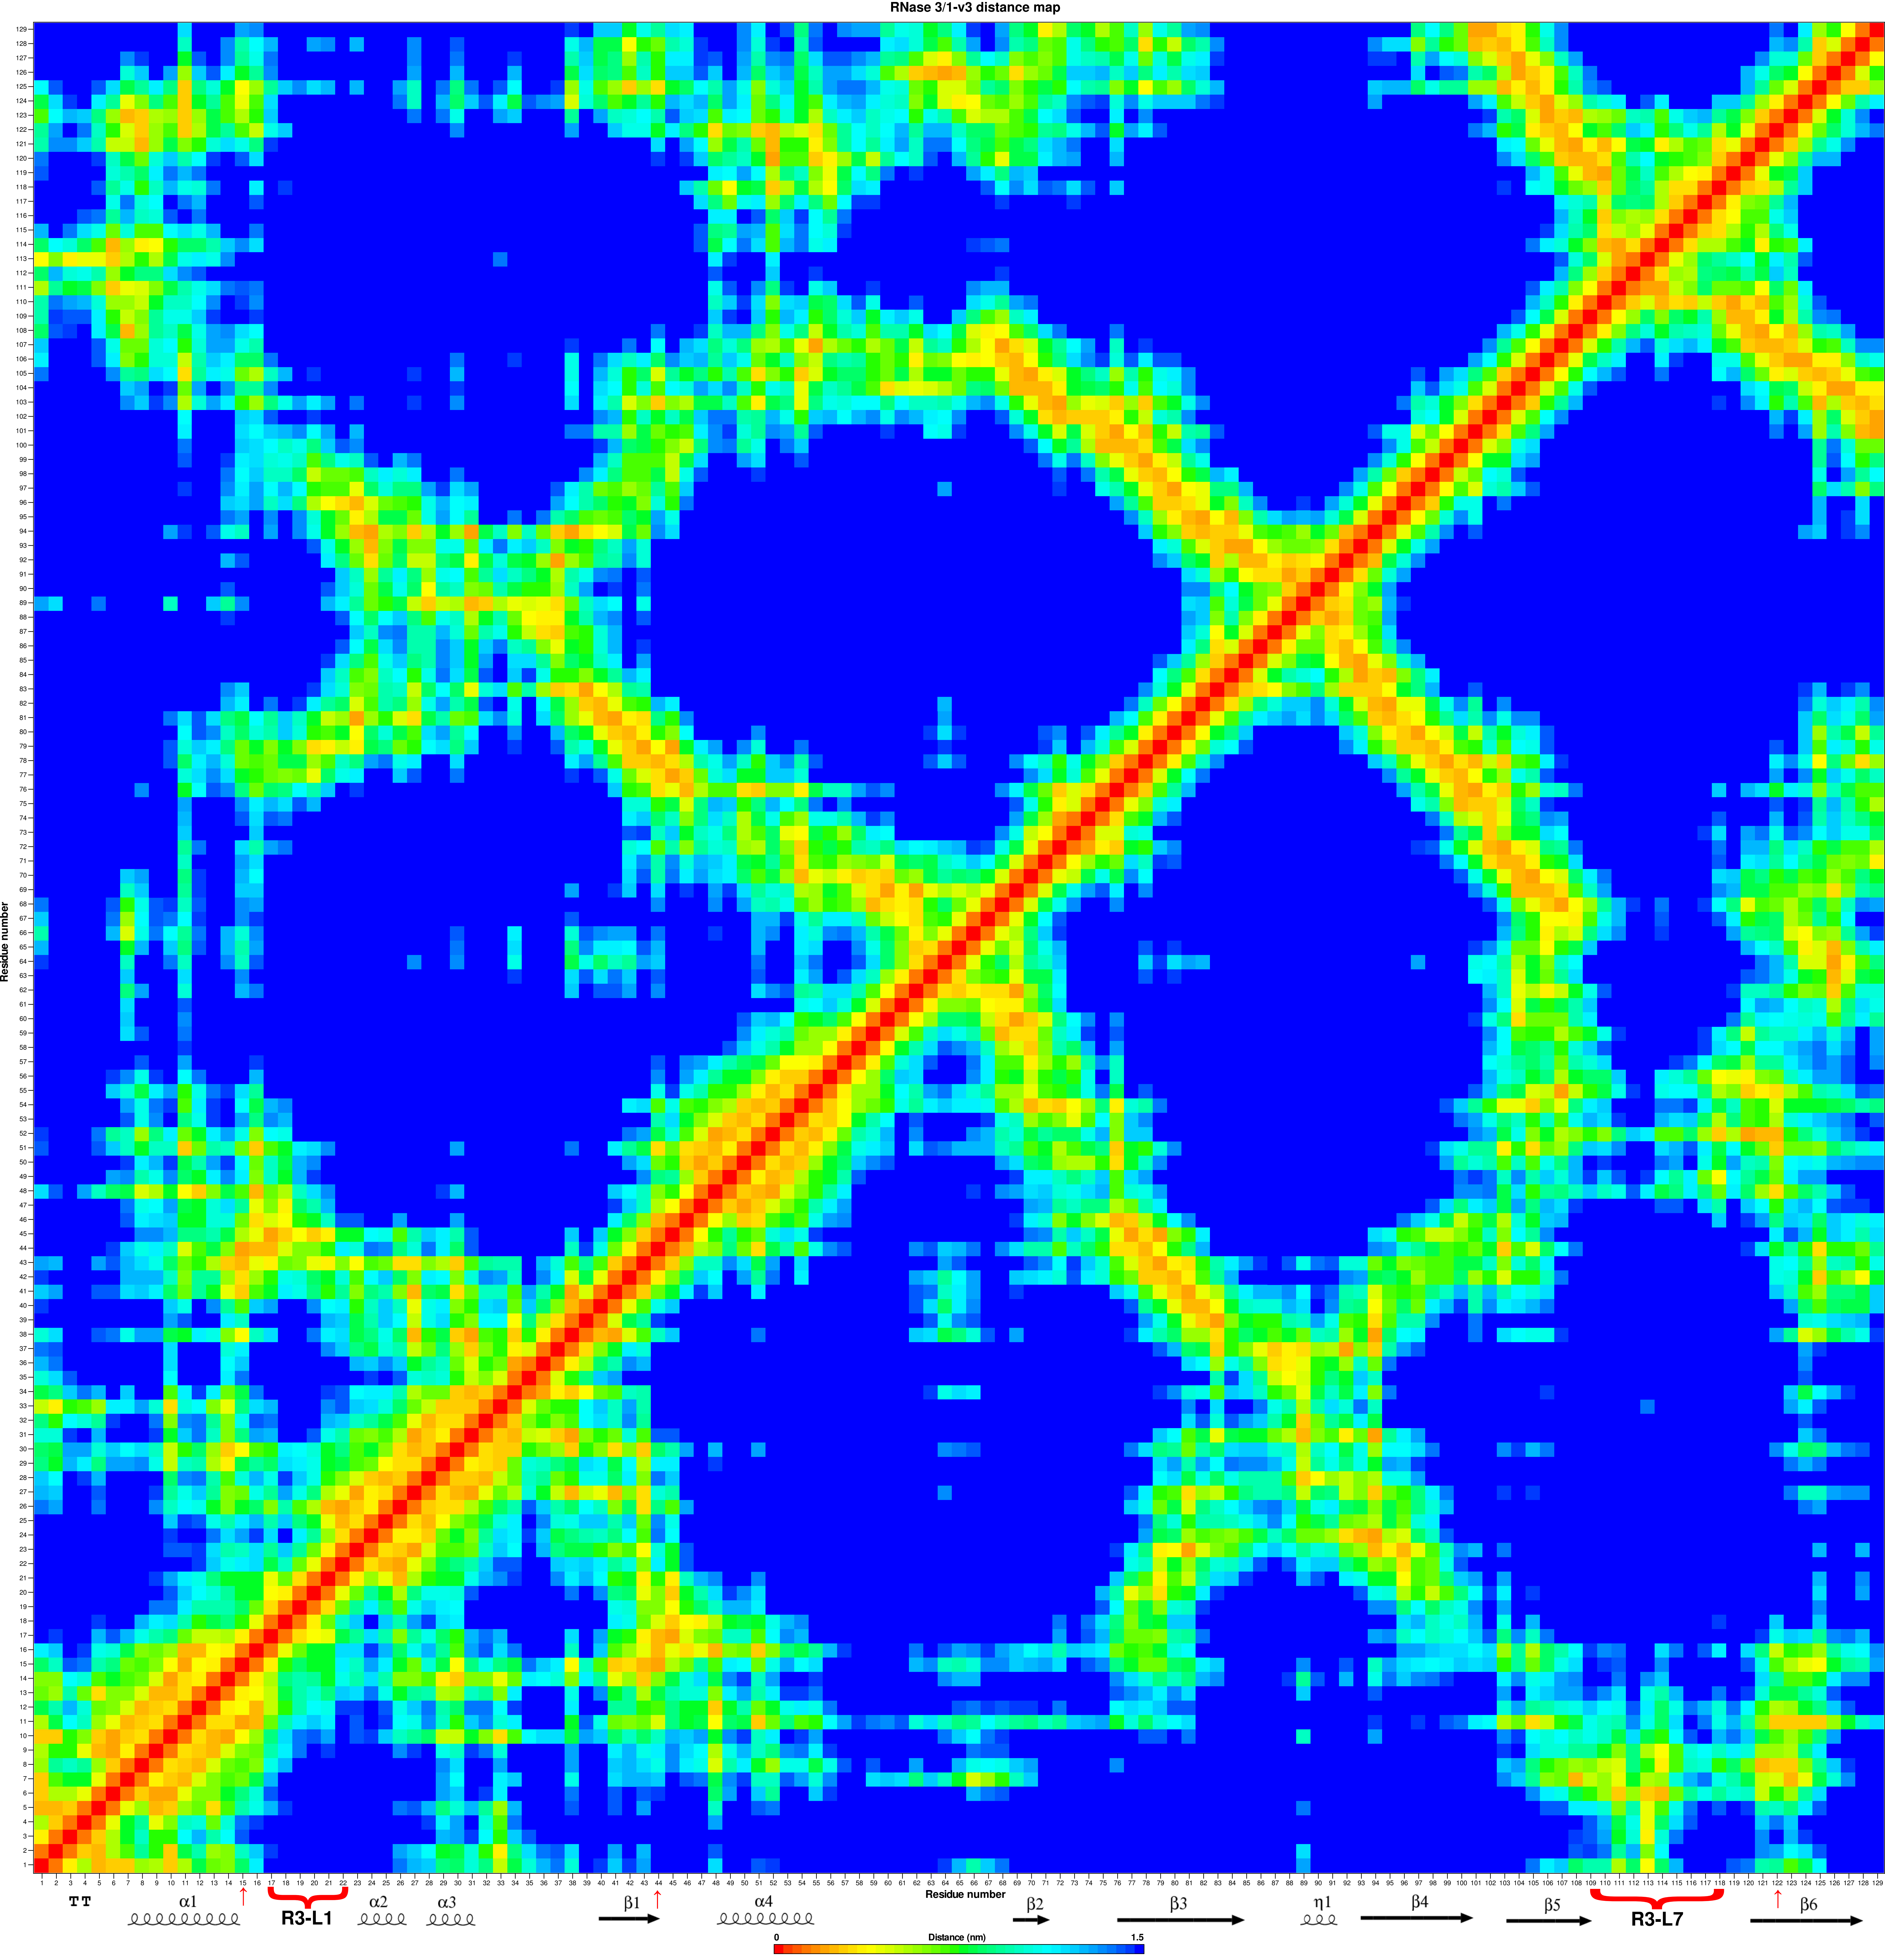

Supplement: s1 [file s1]

RNase 3/1-v1 distance map

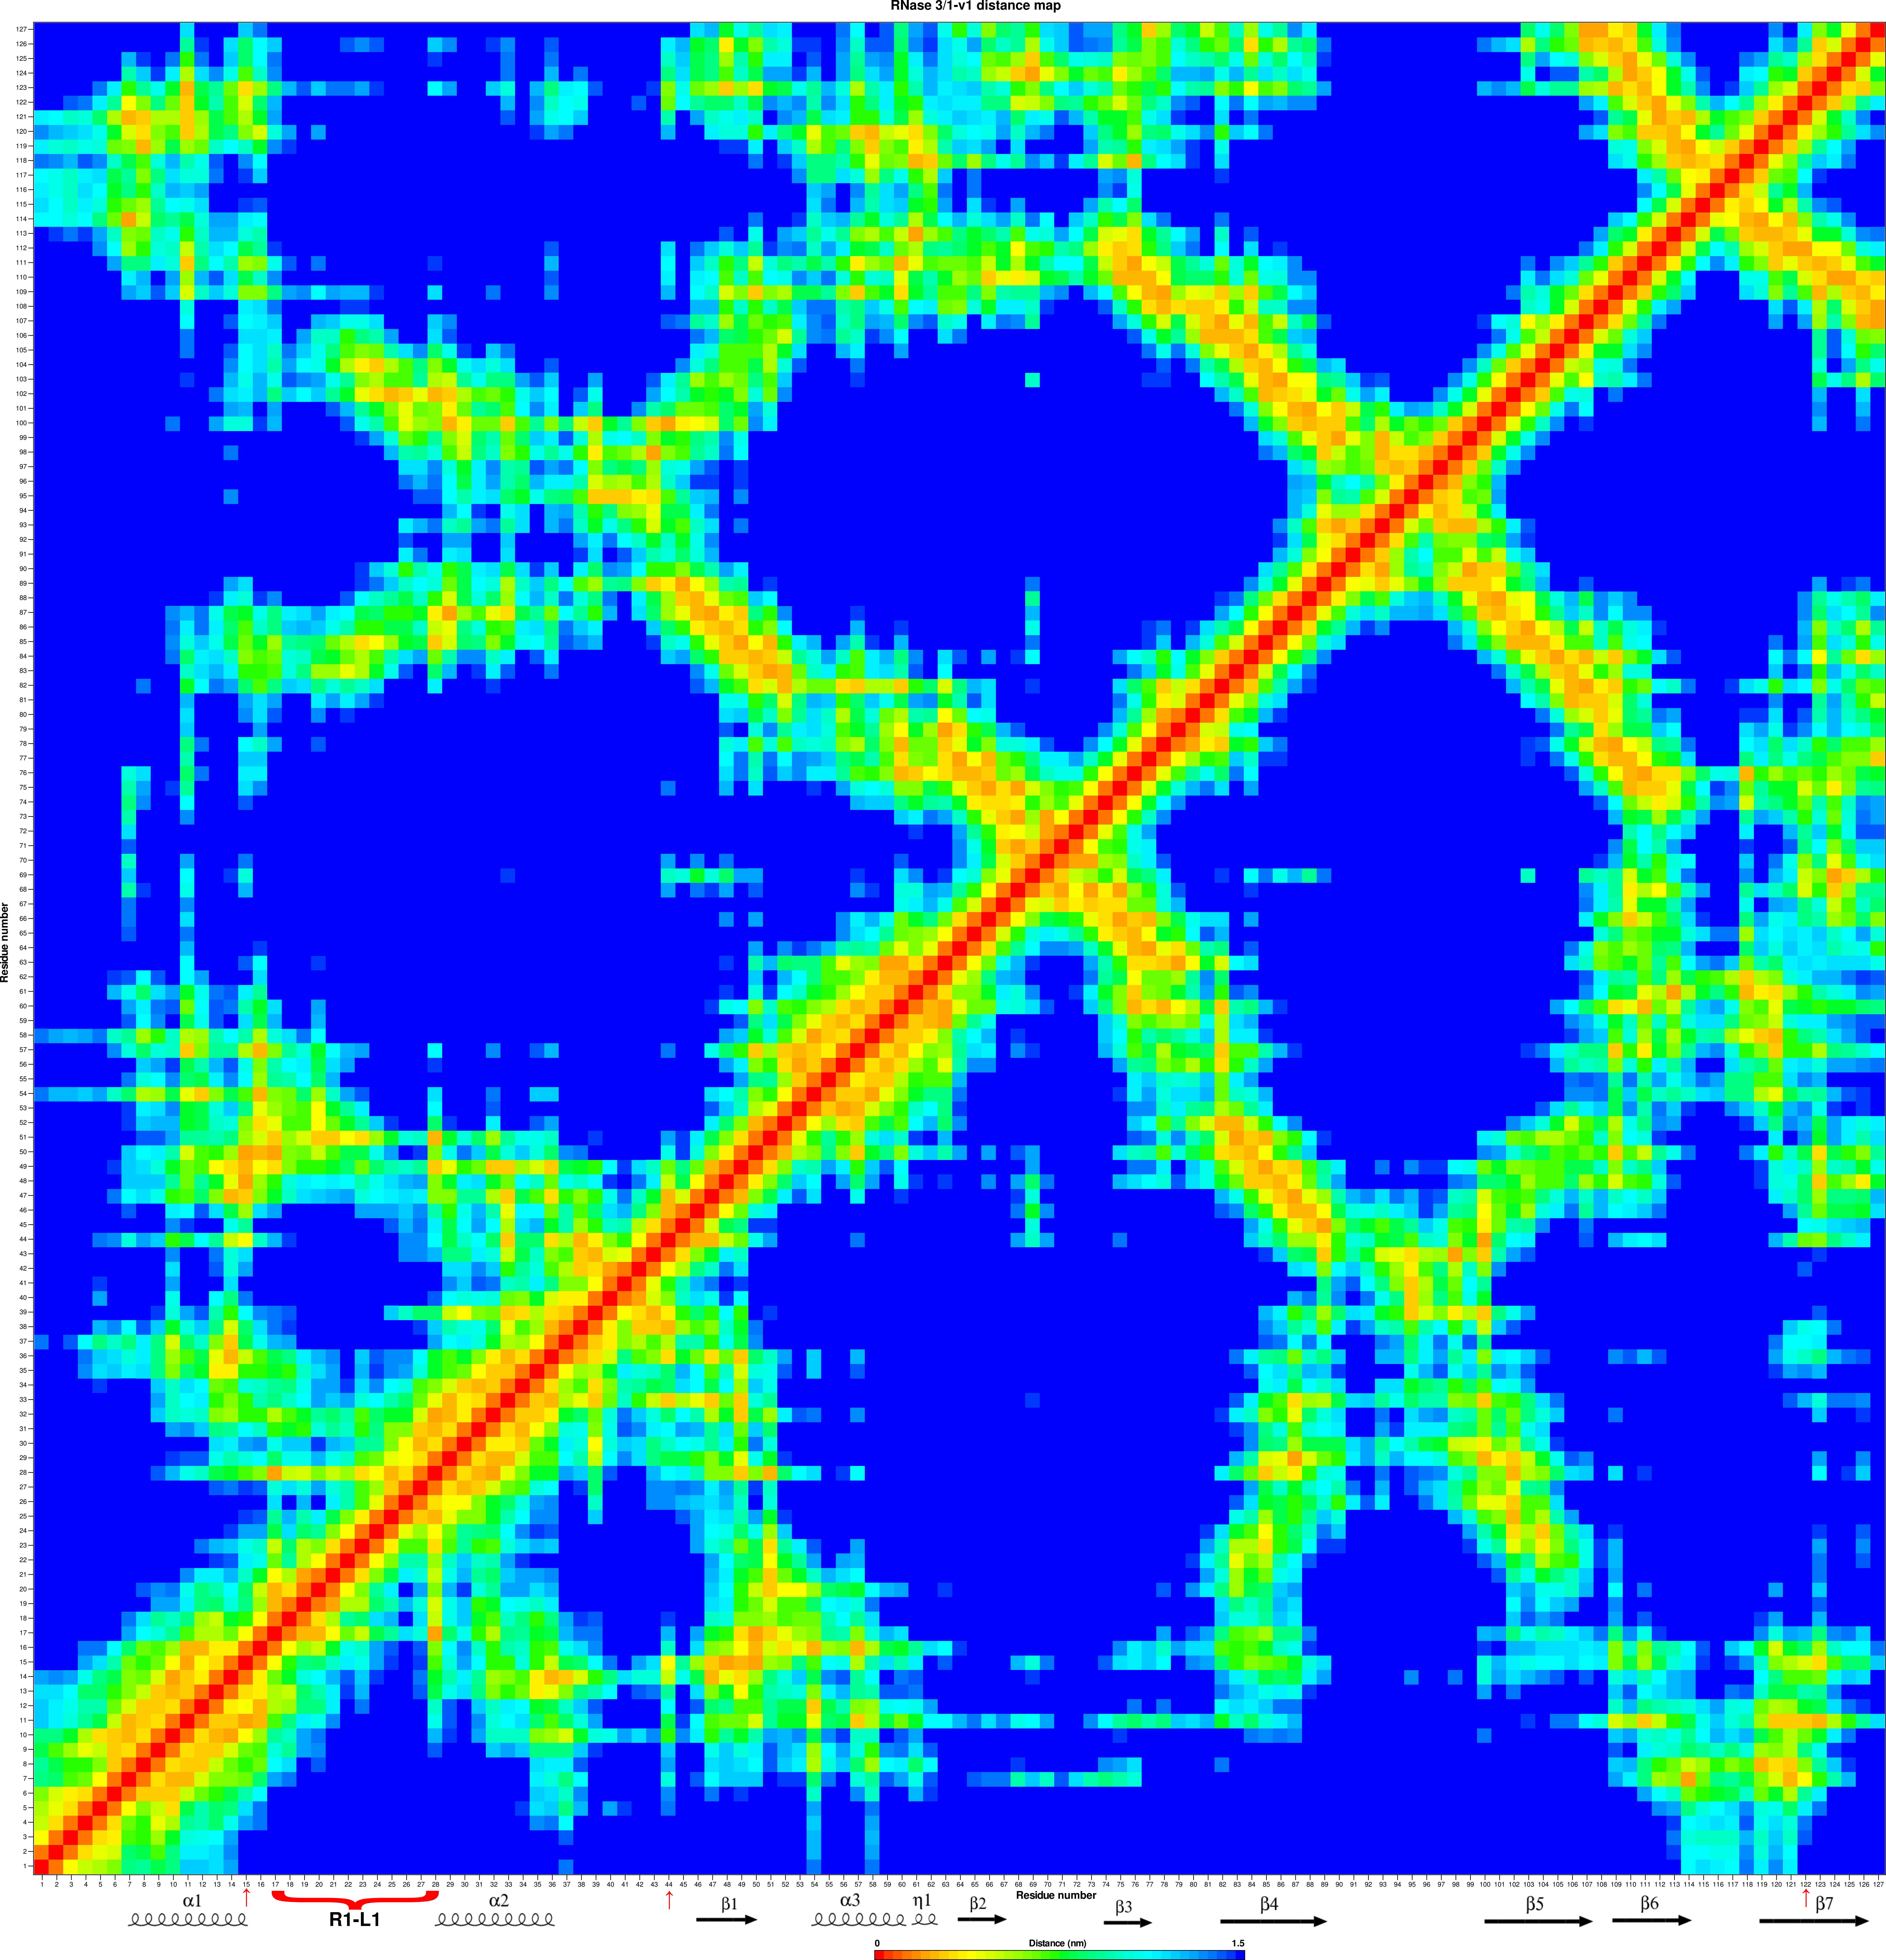

Supplement: s1 [file s1]

RNase 3/1-v2 distance map

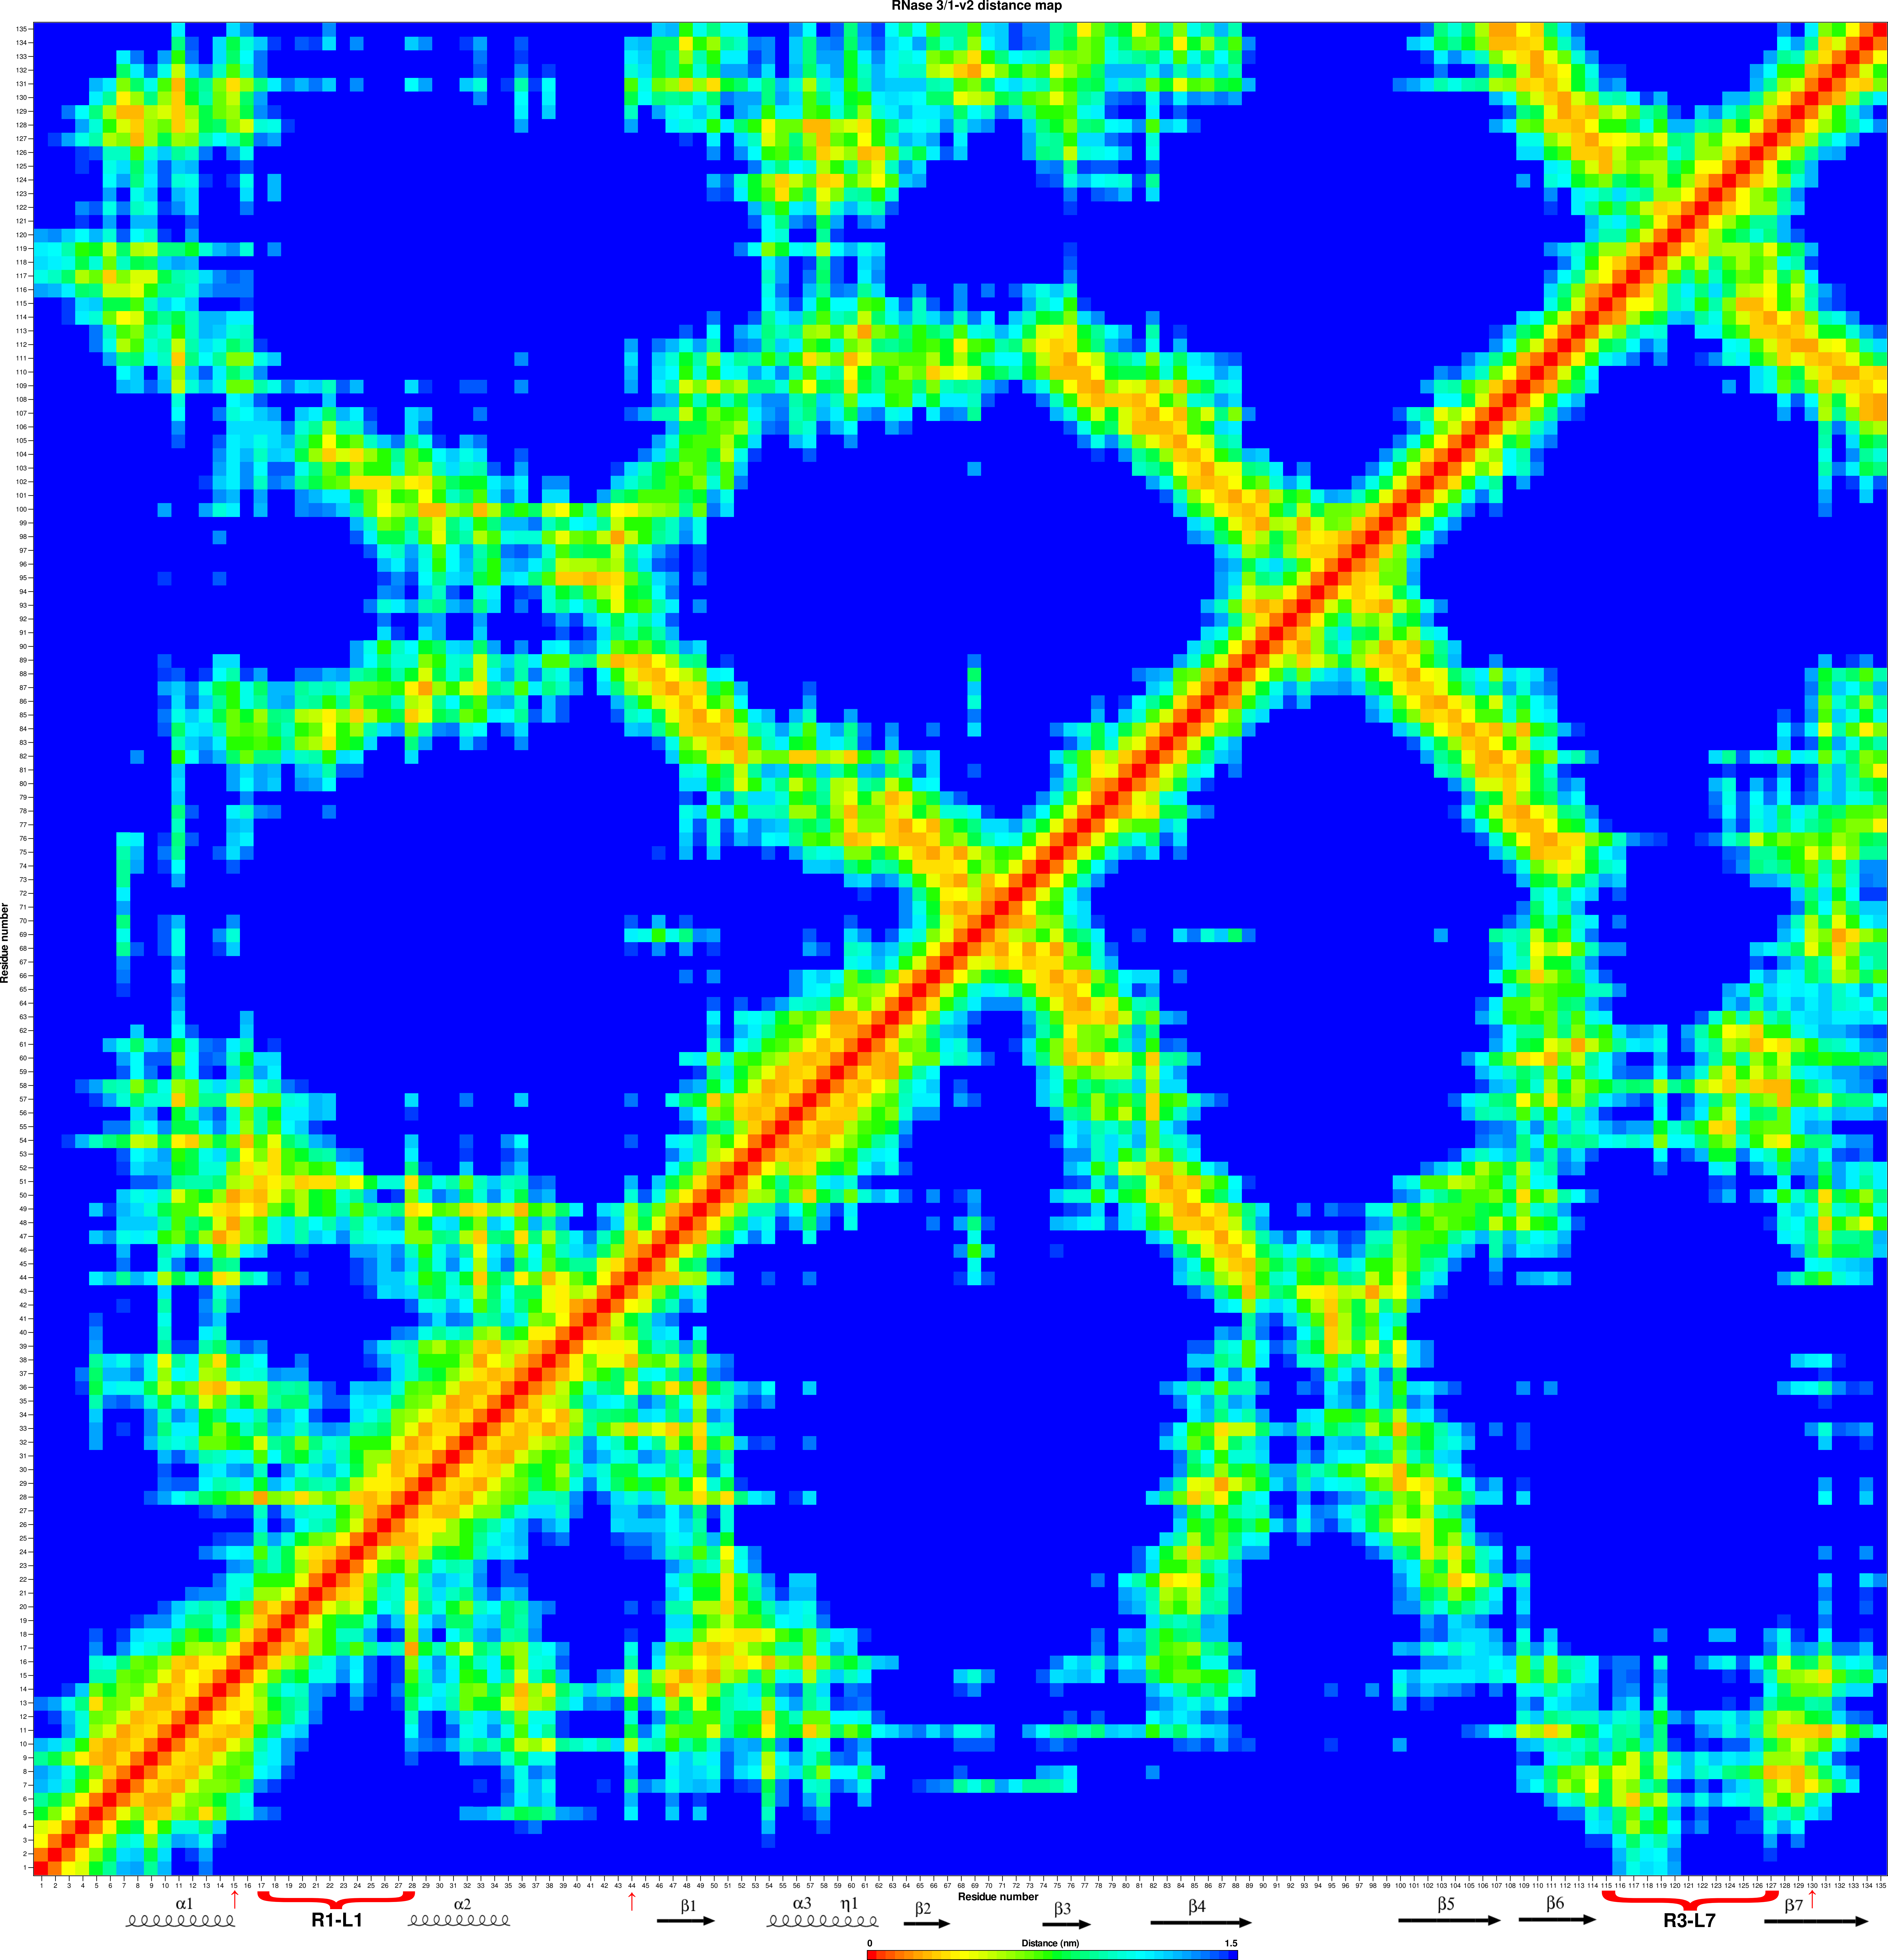

Supplement: s1 [file s1]
